# Supplementary material
Source: PubMed Central journal article supplement (PMC6512986)
Supplement: NIHMS1521848-supplement-Reporting_Summary.pdf [file NIHMS1521848-supplement-Reporting_Summary.pdf]

## Reporting Summary

Nature Research wishes to improve the reproducibility of the work that we publish. This form provides structure for consistency and transparency in reporting. For further information on Nature Research policies, see [Authors & Referees](#) and the [Editorial Policy Checklist](#).

### Statistical parameters

When statistical analyses are reported, confirm that the following items are present in the relevant location (e.g. figure legend, table legend, main text, or Methods section).

n/a Confirmed

- The exact sample size ( $n$ ) for each experimental group/condition, given as a discrete number and unit of measurement
- An indication of whether measurements were taken from distinct samples or whether the same sample was measured repeatedly
- The statistical test(s) used AND whether they are one- or two-sided  
*Only common tests should be described solely by name; describe more complex techniques in the Methods section.*
- A description of all covariates tested
- A description of any assumptions or corrections, such as tests of normality and adjustment for multiple comparisons
- A full description of the statistics including central tendency (e.g. means) or other basic estimates (e.g. regression coefficient) AND variation (e.g. standard deviation) or associated estimates of uncertainty (e.g. confidence intervals)
- For null hypothesis testing, the test statistic (e.g.  $F$ ,  $t$ ,  $r$ ) with confidence intervals, effect sizes, degrees of freedom and  $P$  value noted  
*Give  $P$  values as exact values whenever suitable.*
- For Bayesian analysis, information on the choice of priors and Markov chain Monte Carlo settings
- For hierarchical and complex designs, identification of the appropriate level for tests and full reporting of outcomes
- Estimates of effect sizes (e.g. Cohen's  $d$ , Pearson's  $r$ ), indicating how they were calculated
- Clearly defined error bars  
*State explicitly what error bars represent (e.g. SD, SE, CI)*

Our web collection on [statistics for biologists](#) may be useful.

### Software and code

Policy information about [availability of computer code](#)

Data collection

Described in the manuscript.

Data analysis

Described in the manuscript.

For manuscripts utilizing custom algorithms or software that are central to the research but not yet described in published literature, software must be made available to editors/reviewers upon request. We strongly encourage code deposition in a community repository (e.g. GitHub). See the Nature Research [guidelines for submitting code & software](#) for further information.

### Data

Policy information about [availability of data](#)

All manuscripts must include a [data availability statement](#). This statement should provide the following information, where applicable:

- Accession codes, unique identifiers, or web links for publicly available datasets
- A list of figures that have associated raw data
- A description of any restrictions on data availability

All the data are available.

## Field-specific reporting

Please select the best fit for your research. If you are not sure, read the appropriate sections before making your selection.

Life sciences       Behavioural & social sciences       Ecological, evolutionary & environmental sciences

For a reference copy of the document with all sections, see [nature.com/authors/policies/ReportingSummary-flat.pdf](https://www.nature.com/authors/policies/ReportingSummary-flat.pdf)

## Life sciences study design

All studies must disclose on these points even when the disclosure is negative.

|                 |                                                                                              |
|-----------------|----------------------------------------------------------------------------------------------|
| Sample size     | <input type="text" value="At least three mice used per donor for xenotransplant."/>          |
| Data exclusions | <input type="text" value="No data were excluded from the analyses."/>                        |
| Replication     | <input type="text" value="All the experiments are replicated more than three times."/>       |
| Randomization   | <input type="text" value="Not relevant. All recipient mice were female, 4-5 weeks of age."/> |
| Blinding        | <input type="text" value="Not relevant for objective measures."/>                            |

## Reporting for specific materials, systems and methods

### Materials & experimental systems

|                                     |                                                                 |
|-------------------------------------|-----------------------------------------------------------------|
| n/a                                 | <input type="checkbox"/> Involved in the study                  |
| <input type="checkbox"/>            | <input checked="" type="checkbox"/> Unique biological materials |
| <input type="checkbox"/>            | <input checked="" type="checkbox"/> Antibodies                  |
| <input checked="" type="checkbox"/> | <input type="checkbox"/> Eukaryotic cell lines                  |
| <input checked="" type="checkbox"/> | <input type="checkbox"/> Palaeontology                          |
| <input type="checkbox"/>            | <input checked="" type="checkbox"/> Animals and other organisms |
| <input type="checkbox"/>            | <input checked="" type="checkbox"/> Human research participants |

### Methods

|                                     |                                                    |
|-------------------------------------|----------------------------------------------------|
| n/a                                 | <input type="checkbox"/> Involved in the study     |
| <input checked="" type="checkbox"/> | <input type="checkbox"/> ChIP-seq                  |
| <input type="checkbox"/>            | <input checked="" type="checkbox"/> Flow cytometry |
| <input checked="" type="checkbox"/> | <input type="checkbox"/> MRI-based neuroimaging    |

## Unique biological materials

Policy information about [availability of materials](#)

|                            |                                                                                                                                    |
|----------------------------|------------------------------------------------------------------------------------------------------------------------------------|
| Obtaining unique materials | <input type="text" value="All unique materials used are readily available from the authors or from standard commercial sources."/> |
|----------------------------|------------------------------------------------------------------------------------------------------------------------------------|

## Antibodies

|                 |                                                                                                                                                 |
|-----------------|-------------------------------------------------------------------------------------------------------------------------------------------------|
| Antibodies used | <input type="text" value="All antibodies used in this study were described in the manuscript and available from standard commercial sources."/> |
| Validation      | <input type="text" value="Each antibody for the species and application is validated."/>                                                        |

## Animals and other organisms

Policy information about [studies involving animals](#); [ARRIVE guidelines](#) recommended for reporting animal research

|                         |                                                                                                                                                                       |
|-------------------------|-----------------------------------------------------------------------------------------------------------------------------------------------------------------------|
| Laboratory animals      | <input type="text" value="NOD.Cg-KitW-41J Tyr + Prkdcscid Il2rgtm1Wjl (NBSGW) female mice (4-5 weeks of age) were obtained from Jackson Laboratory (Stock 026622)."/> |
| Wild animals            | <input type="text" value="The study did not involve wild animals."/>                                                                                                  |
| Field-collected samples | <input type="text" value="The study did not involve samples collected from the field."/>                                                                              |

## Human research participants

Policy information about [studies involving human research participants](#)

|                            |                                                                                                                                                                                    |
|----------------------------|------------------------------------------------------------------------------------------------------------------------------------------------------------------------------------|
| Population characteristics | Beta-thalassemia and sickle cell disease patients from Boston Children's Hospital were used as CD34+ HSPC donors.                                                                  |
| Recruitment                | Beta-thalassemia subjects recruited sequentially from the thalassemia clinic. Sickle cell disease subjects already recruited for a study of plerixafor mobilization (NCT02989701). |

## Flow Cytometry

### Plots

Confirm that:

- The axis labels state the marker and fluorochrome used (e.g. CD4-FITC).
- The axis scales are clearly visible. Include numbers along axes only for bottom left plot of group (a 'group' is an analysis of identical markers).
- All plots are contour plots with outliers or pseudocolor plots.
- A numerical value for number of cells or percentage (with statistics) is provided.

### Methodology

|                           |                                                                                                   |
|---------------------------|---------------------------------------------------------------------------------------------------|
| Sample preparation        | The sample preparation and biological source of the cells were described in the manuscript.       |
| Instrument                | Cell sorting and flow cytometry analysis was performed on a FACSAria II machine (BD Biosciences). |
| Software                  | The flow cytometry data were analyzed by flowJo 10 software.                                      |
| Cell population abundance | The purity of the samples was determined by rerunning with flow cytometry.                        |
| Gating strategy           | The gating strategy was described in the manuscript and previous publications.                    |

- Tick this box to confirm that a figure exemplifying the gating strategy is provided in the Supplementary Information.
