# Supplementary material
Source: PubMed Central journal article supplement (PMC6512986)
Supplement: NIHMS1521848-supplement-Supplementary_Table_2_and_3.pdf [file NIHMS1521848-supplement-Supplementary_Table_2_and_3.pdf]

**Supplementary Table 2. *HBB* genotype of  $\beta$ -thalassemia patients.**

| Simplified genotype                   | Genotype                                                                                                 |
|---------------------------------------|----------------------------------------------------------------------------------------------------------|
| $\beta^0\beta^0$ #1                   | Homozygous codon 44 -C; $\alpha\alpha/\alpha\alpha$                                                      |
| $\beta^0\beta^0$ #2                   | Homozygous IVS I-1 (G>A)                                                                                 |
| $\beta^+\beta^0$ #1                   | IVS II-745 (C>G); codon 44 -C; $\alpha\alpha/\alpha\alpha$                                               |
| $\beta^+\beta^0$ #2                   | IVS I-110 (G>A); codon 39 CAG>TAG; $\alpha\alpha/\alpha\alpha$                                           |
| $\beta^+\beta^+$                      | Homozygous IVS-I-5 (G>C); $\alpha\alpha/\alpha\alpha$                                                    |
| ( $^A\gamma\delta\beta$ ) $^0\beta^0$ | Large Chinese ( $^A\gamma\delta\beta$ ) $^0$ deletion; codon 41/42 (-CTTT) ; $\alpha\alpha/\alpha\alpha$ |
| $\beta^E\beta^0$ #1                   | Codon 26 GAG>AAG hemoglobin E; codon 71/72 +A                                                            |
| $\beta^E\beta^0$ #2                   | Codon 26 GAG>AAG hemoglobin E; codon 71/72 +T                                                            |

**Supplementary Table 3. Primary xenotransplant of Cas9 RNP edited CD34<sup>+</sup> HSPCs to 33 NBSGW recipients.**

| RNP        | sgRNA        | Donor               | Cell number | Glycerol |
|------------|--------------|---------------------|-------------|----------|
| 2xNLS-Cas9 | 1617         | $\beta^A\beta^A$ #1 | 0.4 M       | 2%       |
| 2xNLS-Cas9 | 1617         | $\beta^A\beta^A$ #2 | 0.8 M       | 2%       |
| 2xNLS-Cas9 | 1617         | $\beta^A\beta^A$ #3 | 0.8 M       | 4%       |
| 2xNLS-Cas9 | <i>AAVS1</i> | $\beta^A\beta^A$ #1 | 0.4 M       | 2%       |
| 3xNLS-Cas9 | <i>AAVS1</i> | $\beta^A\beta^A$ #3 | 0.4 M       | 2%       |
| 3xNLS-Cas9 | 1617         | $\beta^A\beta^A$ #1 | 0.2 M       | 0%       |
| 3xNLS-Cas9 | 1617         | $\beta^S\beta^S$ #1 | 0.2 M       | 0%       |
| 3xNLS-Cas9 | 1617         | $\beta^S\beta^S$ #2 | 0.8 M       | 2%       |
| 3xNLS-Cas9 | 1617         | $\beta^A\beta^A$ #3 | 0.8 M       | 2%       |
| 3xNLS-Cas9 | 1617         | $\beta^A\beta^A$ #3 | 0.8 M       | 4%       |
| 3xNLS-Cas9 | 1617         | $\beta^A\beta^A$ #3 | 0.8 M       | 6%       |
| 3xNLS-Cas9 | 1617         | $\beta^A\beta^A$ #4 | 0.8 M       | 2%       |
| 3xNLS-Cas9 | 1617         | $\beta^A\beta^A$ #5 | 0.8 M       | 2%       |
